# Supplementary material for: Quantifying global terrestrial methanol emissions using observations from the TES satellite sensor
Source: Copernicus journal article supplement (doi:10.5194/acp-14-2555-2014), 2014-03-13
Supplement: Supplementary file 1 [file acp-14-2555-2014-supplement.pdf]

1 **Quantifying global terrestrial methanol emissions using**  
2 **observations from the TES satellite sensor**

3  
4 **K. C. Wells<sup>1</sup>, D. B. Millet<sup>1</sup>, K. E. Cady-Pereira<sup>2</sup>, M. W. Shephard<sup>3</sup>, D. K. Henze<sup>4</sup>, N.**  
5 **Bousserez<sup>4</sup>, E. C. Apel<sup>5</sup>, J. de Gouw<sup>6,7</sup>, C. Warneke<sup>6,7</sup>, H. B. Singh<sup>8</sup>**

6 [1] {Department of Soil, Water, and Climate, University of Minnesota, St. Paul, Minnesota,  
7 USA}

8 [2] {Atmospheric and Environmental Research, Inc., Lexington, Massachusetts, USA}

9 [3] {Environment Canada, Downsview, Ontario, Canada}

10 [4] {Department of Mechanical Engineering, University of Colorado at Boulder, Boulder,  
11 Colorado, USA}

12 [5] {Atmospheric Chemistry Division, NCAR, Boulder, Colorado, USA}

13 [6] {Earth System Research Laboratory, NOAA, Boulder, Colorado, USA}

14 [7] {CIRES, University of Colorado, Boulder, Colorado, USA}

15 [8] {NASA Ames Research Center, Moffett Field, California, USA}

16 Correspondence to: D. B. Millet (dbm@umn.edu)

17

18

1 Supplemental information

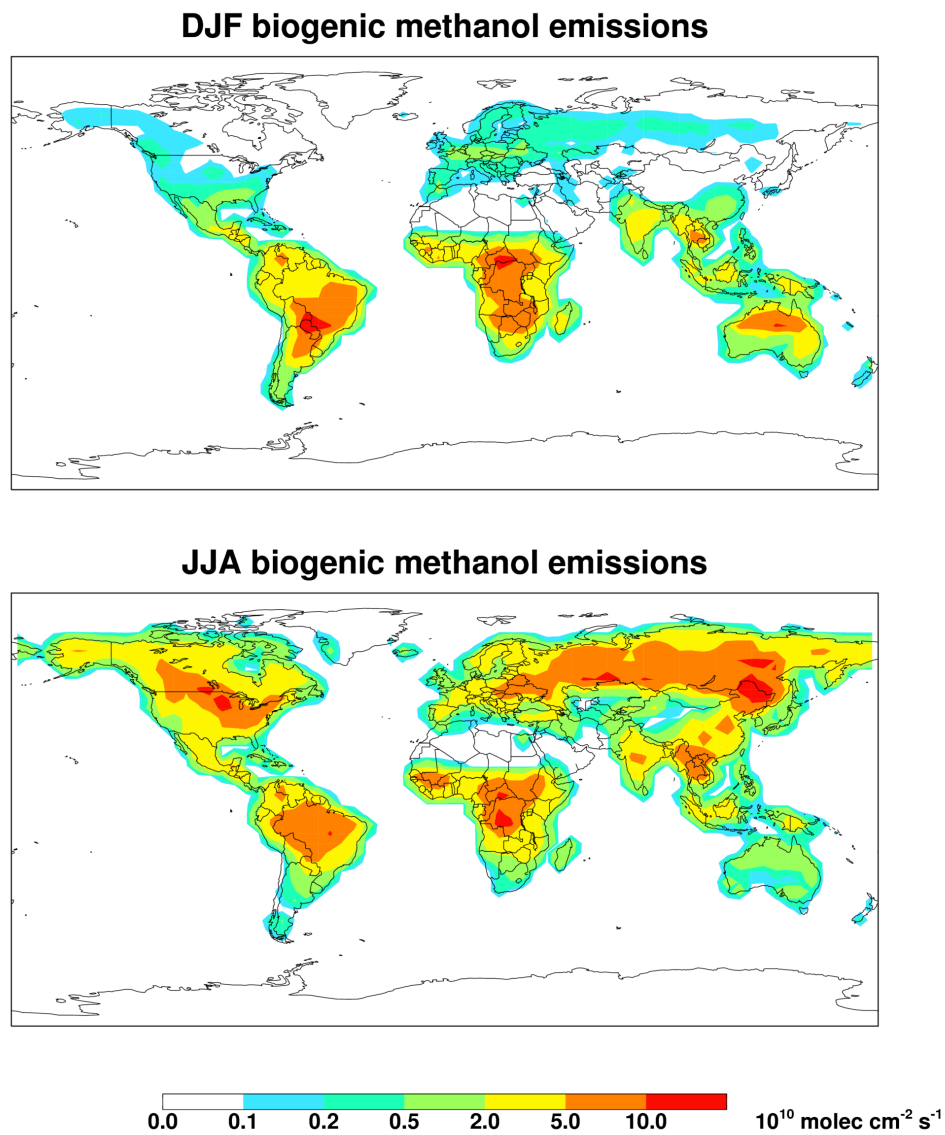

2  
3 Figure S1. December-January-February (DJF, top) and June-July-August (JJA, bottom) biogenic  
4 methanol emissions in the GEOS-Chem a priori simulation (year-2008).

5

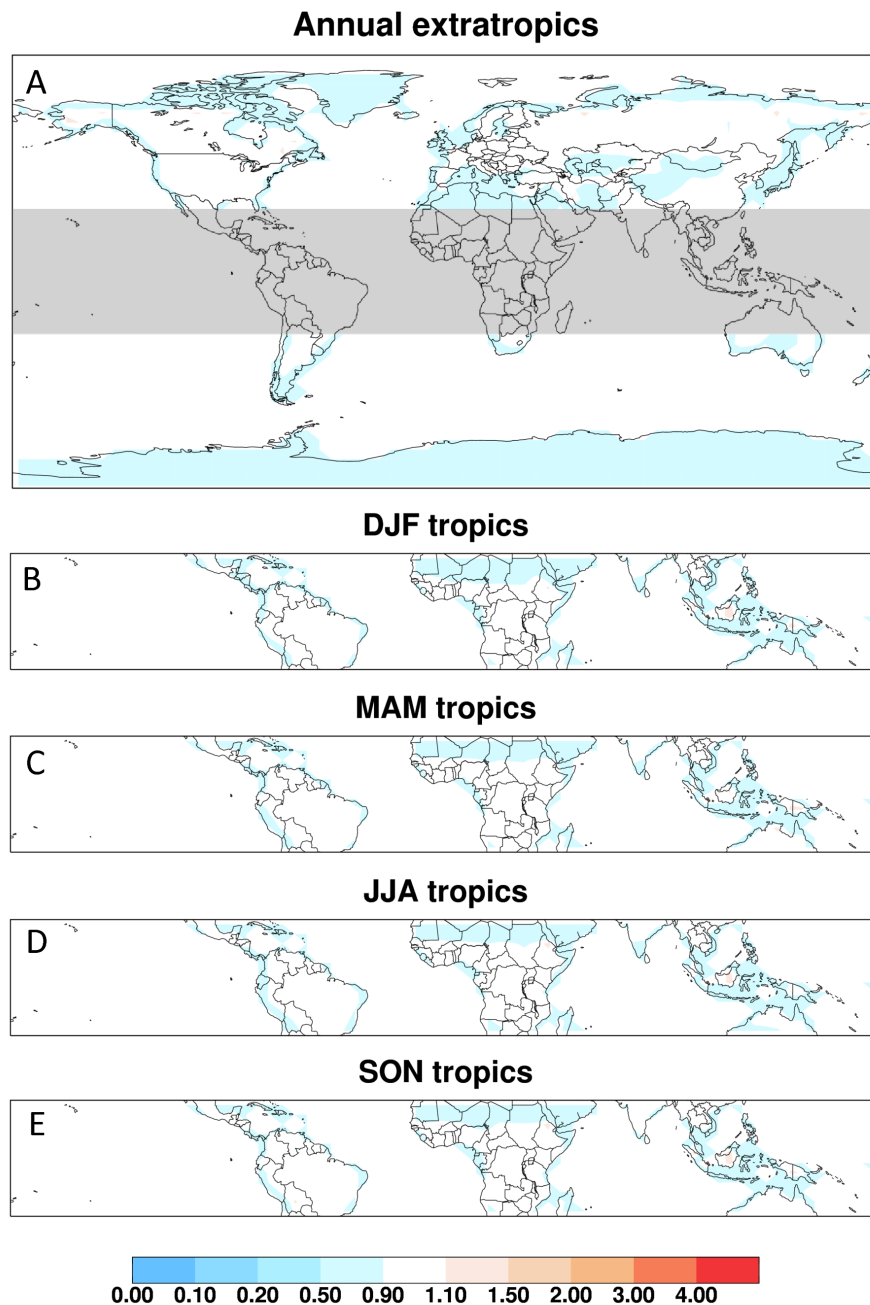

1  
 2 Figure S2. Test inversion using pseudo observations, in which the a priori emissions are scaled to  
 3  $0.5\times$  their actual values. Shown are the a posteriori emission scale factors (the true value is 1.0 in  
 4 each case) resulting from the test inversion. The optimization is performed (A) annually in the  
 5 extratropics and (B)-(E) seasonally in the tropics. The color bar scale is selected to match that in  
 6 Fig. 5.

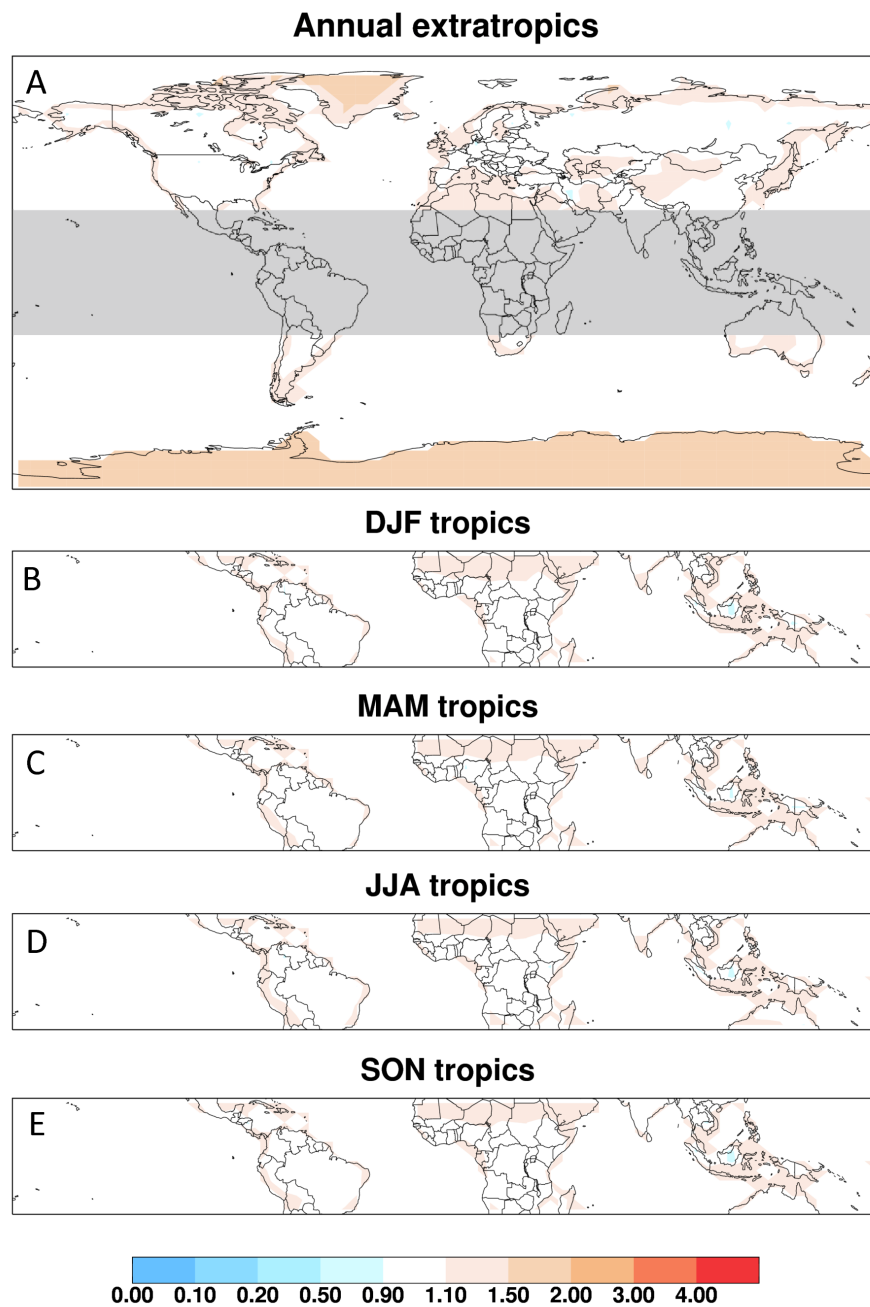

1  
 2 Figure S3. Test inversion using pseudo observations, in which the a priori emissions are scaled to  
 3  $1.5\times$  their actual values. Shown are the a posteriori emission scale factors (the true value is 1.0 in  
 4 each case) resulting from the test inversion. The optimization is performed (A) annually in the  
 5 extratropics and (B)-(E) seasonally in the tropics. The color bar scale is selected to match that in  
 6 Fig. 5.  
 7

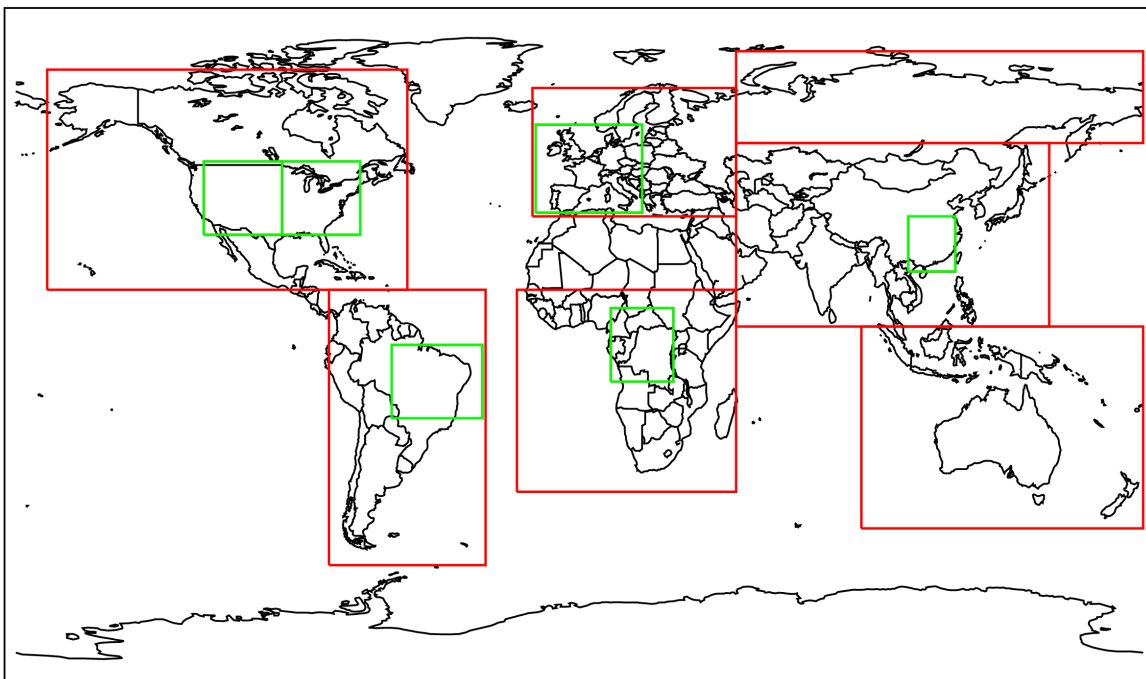

1  
2 Figure S4. Regions employed for quantifying terrestrial methanol fluxes (red) and for  
3 investigating TES methanol:CO correlations and the seasonality of tropical emissions (green).  
4
